# Supplementary material
Source: PubMed Central journal article supplement (PMC6786404)
Supplement: 41401_2019_273_MOESM1_ESM.pdf [file 41401_2019_273_MOESM1_ESM.pdf]

# Intravenous formulation of *Panax notoginseng* root extract: human pharmacokinetics of ginsenosides and potential for perpetrating drug interactions

Salisa Pintosophon, Wei Niu, Xiao-na Duan, Olajide E. Olaleye, Yu-hong Huang, Feng-qing Wang, Yan-fen Li, Jun-ling Yang, Chuan Li

*Acta Pharmacologica Sinica* (doi: 10.1038/s41401-019-0273-1)

## CONTENTS

|                                |                                                                                                                                                                                                                                                                                                                                  |    |
|--------------------------------|----------------------------------------------------------------------------------------------------------------------------------------------------------------------------------------------------------------------------------------------------------------------------------------------------------------------------------|----|
| <b>Supplementary Table S1.</b> | Ginsenosides present in XueShuanTong                                                                                                                                                                                                                                                                                             | 2  |
| <b>Supplementary Table S2.</b> | Ginsenosides, unchanged and metabolized, detected in plasma and urine samples after intravenously dosing XueShuanTong in the first human study                                                                                                                                                                                   | 5  |
| <b>Supplementary Table S3.</b> | Pharmacokinetics of midazolam and its metabolite 1'-hydroxymidazolam in human subjects of human study 2                                                                                                                                                                                                                          | 6  |
| <b>Supplementary Table S4.</b> | In vitro inhibition of human P450 enzymes by ginsenosides                                                                                                                                                                                                                                                                        | 7  |
| <b>Supplementary Table S5.</b> | Pharmacokinetics of ginsenosides in rats after a single 15-min intravenous infusion of XueShuanTong                                                                                                                                                                                                                              | 8  |
| <b>Supplementary Fig. S1</b>   | Mean total plasma concentrations of ginsenosides Rb <sub>1</sub> ( <b>1</b> ), Rd ( <b>2</b> ), and Rg <sub>1</sub> ( <b>31</b> ) and notoginsenoside R <sub>1</sub> ( <b>32</b> ) over time after dosing XueShuanTong at 500 mg/day on days 4 ( <b>a, b</b> ) and 18 ( <b>c, d</b> ) in human subjects (m17–m24; human study 2) | 9  |
| <b>Supplementary Fig. S2</b>   | Comparative % inhibition of OATP1B3 by ginsenoside Rb <sub>1</sub> ( <b>1</b> ) alone and in the presence of ginsenosides Rd ( <b>2</b> ) and Rg <sub>1</sub> ( <b>31</b> ) and notoginsenoside R <sub>1</sub> ( <b>32</b> )                                                                                                     | 10 |
| <b>Supplementary Fig. S3</b>   | Inductive effects of ginsenosides Rb <sub>1</sub> ( <b>1</b> ), Rd ( <b>2</b> ), and Rg <sub>1</sub> ( <b>31</b> ), notoginsenoside R <sub>1</sub> ( <b>32</b> ), and XueShuanTong ( <b>XST</b> ) on CYP1A2 activity ( <b>a–c</b> ), CYP2B6 activity ( <b>d–f</b> ), and CYP2B6 mRNA ( <b>g</b> )                                | 11 |

| Supplementary Table S1. Ginsenosides present in XueShuanTong |                                |                                              |                                   |                                                                                                                                                                                                                                                                                           |                     |                                                  |                                                   |
|--------------------------------------------------------------|--------------------------------|----------------------------------------------|-----------------------------------|-------------------------------------------------------------------------------------------------------------------------------------------------------------------------------------------------------------------------------------------------------------------------------------------|---------------------|--------------------------------------------------|---------------------------------------------------|
| ID                                                           | Compound                       | Liquid chromatography/mass spectrometry data |                                   |                                                                                                                                                                                                                                                                                           | Molecular mass (Da) | Molecular formula                                | Compound dose level ( $\mu\text{mol/day}$ ) (RSD) |
|                                                              |                                | $t_R$ (min)                                  | $[\text{M}-\text{H}]^-$ ( $m/z$ ) | Fragmentation profile ( $m/z$ )                                                                                                                                                                                                                                                           |                     |                                                  |                                                   |
| <i>Ppd-type ginsenosides</i>                                 |                                |                                              |                                   |                                                                                                                                                                                                                                                                                           |                     |                                                  |                                                   |
| 1                                                            | Ginsenoside Rb <sub>1</sub>    | 24.03                                        | 1107.5948                         | 945.5441 [M-H-Glc] <sup>-</sup><br>783.4908 [M-H-2Glc] <sup>-</sup><br>621.4377 [M-H-3Glc] <sup>-</sup><br>459.3820 [M-H-4Glc] <sup>-</sup>                                                                                                                                               | 1108.6029           | C <sub>54</sub> H <sub>92</sub> O <sub>23</sub>  | 112.74 ± 7.89 (7.0%)                              |
| 2                                                            | Ginsenoside Rd                 | 25.64                                        | 945.5411                          | 783.4921 [M-H-Glc] <sup>-</sup><br>621.4380 [M-H-2Glc] <sup>-</sup><br>459.3849 [M-H-3Glc] <sup>-</sup>                                                                                                                                                                                   | 946.5501            | C <sub>48</sub> H <sub>82</sub> O <sub>18</sub>  | 4.25 ± 0.79 (18.6%)                               |
| 3                                                            | Notoginsenoside Fa             | 23.55                                        | 1239.6377                         | 1107.5973 [M-H-Xyl] <sup>-</sup><br>945.5430 [M-H-Xyl-Glc] <sup>-</sup><br>783.4887 [M-H-Xyl-2Glc] <sup>-</sup><br>621.4361 [M-H-Xyl-3Glc] <sup>-</sup>                                                                                                                                   | 1240.6452           | C <sub>59</sub> H <sub>100</sub> O <sub>27</sub> | 3.16 ± 0.23 (7.3%)                                |
| 4                                                            | Ginsenoside Ra <sub>3</sub>    | 23.82                                        | 1239.6357                         | 1107.5972 [M-H-Xyl] <sup>-</sup><br>945.5421 [M-H-Xyl-Glc] <sup>-</sup><br>783.4893 [M-H-Xyl-2Glc] <sup>-</sup><br>621.4333 [M-H-Xyl-3Glc] <sup>-</sup>                                                                                                                                   | 1240.6452           | C <sub>59</sub> H <sub>100</sub> O <sub>27</sub> | 3.22 ± 0.25 (7.9%)                                |
| 5                                                            | Notoginsenoside R <sub>4</sub> | 23.02                                        | 1239.6378                         | 1107.6008 [M-H-Xyl] <sup>-</sup><br>945.5449 [M-H-Xyl-Glc] <sup>-</sup><br>783.4935 [M-H-Xyl-2Glc] <sup>-</sup><br>621.4390 [M-H-Xyl-3Glc] <sup>-</sup>                                                                                                                                   | 1240.6452           | C <sub>59</sub> H <sub>100</sub> O <sub>27</sub> | 1.56 ± 0.20 (13.1%)                               |
| 6                                                            | Ginsenoside F <sub>2</sub>     | 28.08                                        | 783.4886                          | 621.4373 [M-H-Glc] <sup>-</sup><br>459.3830 [M-H-2Glc] <sup>-</sup>                                                                                                                                                                                                                       | 784.4973            | C <sub>42</sub> H <sub>72</sub> O <sub>13</sub>  | 1.33 ± 0.49 (36.7%)                               |
| 7                                                            | Notoginsenoside D/T isomer-1   | 22.52                                        | 1371.6759                         | 1239.6340 [M-H-Xyl] <sup>-</sup><br>1107.5901 [M-H-2Xyl] <sup>-</sup><br>1077.5787 [M-H-Xyl-Glc] <sup>-</sup><br>945.5456 [M-H-2Xyl-Glc] <sup>-</sup><br>783.4897 [M-H-2Xyl-2Glc] <sup>-</sup>                                                                                            | 1372.6875           | C <sub>64</sub> H <sub>108</sub> O <sub>31</sub> | 0.46 ± 0.04 (8.5%)                                |
| 8                                                            | Ginsenoside Rb <sub>3</sub>    | 24.86                                        | 1077.5859                         | 945.5410 [M-H-Xyl] <sup>-</sup><br>783.4888 [M-H-Xyl-Glc] <sup>-</sup><br>621.4354 [M-H-Xyl-2Glc] <sup>-</sup><br>459.3837 [M-H-Xyl-3Glc] <sup>-</sup>                                                                                                                                    | 1078.5924           | C <sub>53</sub> H <sub>90</sub> O <sub>22</sub>  | 0.51 ± 0.07 (14.5%)                               |
| 9                                                            | Notoginsenoside K              | 26.48                                        | 945.5416                          | 783.4841 [M-H-Glc] <sup>-</sup><br>621.4367 [M-H-2Glc] <sup>-</sup><br>459.3826 [M-H-3Glc] <sup>-</sup>                                                                                                                                                                                   | 946.5503            | C <sub>48</sub> H <sub>82</sub> O <sub>18</sub>  | 0.24 ± 0.07 (28.9%)                               |
| 10                                                           | Notoginsenoside D/T isomer-2   | 23.33                                        | 1371.6797                         | 1239.6438 [M-H-Xyl] <sup>-</sup><br>1107.5981 [M-H-2Xyl] <sup>-</sup><br>1077.5912 [M-H-Xyl-Glc] <sup>-</sup><br>945.5427 [M-H-2Xyl-Glc] <sup>-</sup><br>783.4919 [M-H-2Xyl-2Glc] <sup>-</sup><br>621.4391 [M-H-2Xyl-3Glc] <sup>-</sup><br>459.3825 [M-H-2Xyl-4Glc] <sup>-</sup>          | 1372.6875           | C <sub>64</sub> H <sub>108</sub> O <sub>31</sub> | 0.33 ± 0.03 (8.1%)                                |
| 11                                                           | Quinquenoside V isomer-1       | 22.93                                        | 1269.6479                         | 1107.5946 [M-H-Glc] <sup>-</sup><br>945.5421 [M-H-2Glc] <sup>-</sup><br>783.4882 [M-H-3Glc] <sup>-</sup><br>621.4387 [M-H-4Glc] <sup>-</sup><br>459.3850 [M-H-5Glc] <sup>-</sup>                                                                                                          | 1270.6559           | C <sub>60</sub> H <sub>102</sub> O <sub>28</sub> | 0.38 ± 0.06 (16.6%)                               |
| 12                                                           | Quinquenoside V isomer-2       | 23.45                                        | 1269.6501                         | 1107.5957 [M-H-Glc] <sup>-</sup><br>945.5429 [M-H-2Glc] <sup>-</sup><br>783.4895 [M-H-3Glc] <sup>-</sup><br>621.4370 [M-H-4Glc] <sup>-</sup><br>459.3845 [M-H-5Glc] <sup>-</sup>                                                                                                          | 1270.6559           | C <sub>60</sub> H <sub>102</sub> O <sub>28</sub> | 0.16 ± 0.01 (8.1%)                                |
| 13                                                           | Ginsenoside Rg <sub>3</sub>    | 28.20                                        | 783.4897                          | 621.4298 [M-H-Glc] <sup>-</sup><br>459.3831 [M-H-2Glc] <sup>-</sup>                                                                                                                                                                                                                       | 784.4973            | C <sub>42</sub> H <sub>72</sub> O <sub>13</sub>  | 0.13 ± 0.02 (14.1%)                               |
| 14                                                           | Ginsenoside Ra <sub>1</sub>    | 24.25                                        | 1209.6285                         | 1077.5844 [M-H-Xyl] <sup>-</sup><br>945.5416 [M-H-Xyl-Ara( $\rho$ )] <sup>-</sup><br>915.5331 [M-H-Xyl-Glc] <sup>-</sup><br>783.4883 [M-H-Xyl-Ara( $\rho$ )-Glc] <sup>-</sup><br>621.4365 [M-H-Xyl-Ara( $\rho$ )-2Glc] <sup>-</sup><br>459.3831 [M-H-Xyl-Ara( $\rho$ )-3Glc] <sup>-</sup> | 1210.6346           | C <sub>58</sub> H <sub>98</sub> O <sub>26</sub>  | 0.07 ± 0.01 (13.5%)                               |
| <i>Ppt-type ginsenosides</i>                                 |                                |                                              |                                   |                                                                                                                                                                                                                                                                                           |                     |                                                  |                                                   |
| 31                                                           | Ginsenoside Rg <sub>1</sub>    | 18.56                                        | 799.4852                          | 637.4321 [M-H-Glc] <sup>-</sup><br>475.3781 [M-H-2Glc] <sup>-</sup>                                                                                                                                                                                                                       | 800.4922            | C <sub>42</sub> H <sub>72</sub> O <sub>14</sub>  | 260.30 ± 17.84 (6.9%)                             |
| 32                                                           | Notoginsenoside R <sub>1</sub> | 17.77                                        | 931.5284                          | 799.4848 [M-H-Xyl] <sup>-</sup><br>769.4742 [M-H-Glc] <sup>-</sup><br>637.4324 [M-H-Xyl-Glc] <sup>-</sup>                                                                                                                                                                                 | 932.5345            | C <sub>47</sub> H <sub>80</sub> O <sub>18</sub>  | 42.61 ± 1.88 (4.4%)                               |

|                                    |                                                                         |       |           |                                                                                                                                                                                                                               |           |                                                 |                         |
|------------------------------------|-------------------------------------------------------------------------|-------|-----------|-------------------------------------------------------------------------------------------------------------------------------------------------------------------------------------------------------------------------------|-----------|-------------------------------------------------|-------------------------|
| 33                                 | Ginsenoside Re                                                          | 18.46 | 945.5432  | 475.3786 [M-H-Xyl-2Glc] <sup>-</sup><br>799.4844 [M-H-Rha] <sup>-</sup><br>783.4907 [M-H-Glc] <sup>-</sup><br>637.4319 [M-H-Rha-Glc] <sup>-</sup><br>475.3784 [M-H-Rha-2Glc] <sup>-</sup>                                     | 946.5501  | C <sub>48</sub> H <sub>82</sub> O <sub>18</sub> | 27.91 ± 2.84<br>(10.2%) |
| 34                                 | Ginsenoside Rh <sub>1</sub>                                             | 22.23 | 637.4316  | 475.3785 [M-H-Glc] <sup>-</sup>                                                                                                                                                                                               | 638.4394  | C <sub>36</sub> H <sub>62</sub> O <sub>9</sub>  | 2.52 ± 0.78<br>(30.9%)  |
| 35                                 | 20-Gluco-ginsenoside Rf                                                 | 17.54 | 961.5363  | 799.4852 [M-H-Glc] <sup>-</sup><br>637.4310 [M-H-2Glc] <sup>-</sup><br>475.3774 [M-H-3Glc] <sup>-</sup>                                                                                                                       | 962.5450  | C <sub>48</sub> H <sub>82</sub> O <sub>19</sub> | 3.41 ± 0.26<br>(7.6%)   |
| 36                                 | Ginsenoside Rg <sub>2</sub>                                             | 22.09 | 783.4889  | 637.4315 [M-H-Rha] <sup>-</sup><br>475.3782 [M-H-Rha-Glc] <sup>-</sup>                                                                                                                                                        | 784.4973  | C <sub>42</sub> H <sub>72</sub> O <sub>13</sub> | 2.42 ± 0.34<br>(14.2%)  |
| 37                                 | Notoginsenoside M/N/R <sub>3</sub> /R <sub>6</sub> isomer-3             | 16.75 | 961.5341  | 799.4866 [M-H-Glc] <sup>-</sup><br>637.4319 [M-H-2Glc] <sup>-</sup><br>475.3783 [M-H-3Glc] <sup>-</sup>                                                                                                                       | 962.5450  | C <sub>48</sub> H <sub>82</sub> O <sub>19</sub> | 1.55 ± 0.20<br>(12.6%)  |
| 38                                 | 20-Gluco-ginsenoside Rf isomer                                          | 17.10 | 961.5366  | 799.4865 [M-H-Glc] <sup>-</sup><br>637.4318 [M-H-2Glc] <sup>-</sup><br>475.3774 [M-H-3Glc] <sup>-</sup>                                                                                                                       | 962.5450  | C <sub>48</sub> H <sub>82</sub> O <sub>19</sub> | 0.86 ± 0.06<br>(6.7%)   |
| 39                                 | Notoginsenoside M/N/R <sub>3</sub> /R <sub>6</sub> isomer-1             | 21.23 | 961.5366  | 799.4856 [M-H-Glc] <sup>-</sup><br>637.4326 [M-H-2Glc] <sup>-</sup><br>475.3789 [M-H-3Glc] <sup>-</sup>                                                                                                                       | 962.5450  | C <sub>48</sub> H <sub>82</sub> O <sub>19</sub> | 0.67 ± 0.03<br>(4.9%)   |
| 40                                 | Ginsenoside Rf                                                          | 21.33 | 799.4866  | 637.4308 [M-H-Glc] <sup>-</sup><br>475.3783 [M-H-2Glc] <sup>-</sup>                                                                                                                                                           | 800.4922  | C <sub>42</sub> H <sub>72</sub> O <sub>14</sub> | 0.65 ± 0.04<br>(5.6%)   |
| 41                                 | Notoginsenoside M/N/R <sub>3</sub> /R <sub>6</sub> isomer-4             | 18.08 | 961.5349  | 799.4819 [M-H-Glc] <sup>-</sup><br>637.4303 [M-H-2Glc] <sup>-</sup><br>475.3775 [M-H-3Glc] <sup>-</sup>                                                                                                                       | 962.5450  | C <sub>48</sub> H <sub>82</sub> O <sub>19</sub> | 0.76 ± 0.04<br>(4.9%)   |
| 42                                 | Notoginsenoside M/N/R <sub>3</sub> /R <sub>6</sub>                      | 16.97 | 961.5342  | 799.4843 [M-H-Glc] <sup>-</sup><br>637.4318 [M-H-2Glc] <sup>-</sup><br>475.3785 [M-H-3Glc] <sup>-</sup>                                                                                                                       | 962.5450  | C <sub>48</sub> H <sub>82</sub> O <sub>19</sub> | 0.63 ± 0.06<br>(10.3%)  |
| 43                                 | Yesaninoside E                                                          | 16.86 | 1107.6007 | 945.5452 [M-H-Glc] <sup>-</sup><br>783.4927 [M-H-2Glc] <sup>-</sup><br>637.4318 [M-H-Rha-2Glc] <sup>-</sup><br>475.3777 [M-H-Rha-3Glc] <sup>-</sup>                                                                           | 1108.6031 | C <sub>54</sub> H <sub>92</sub> O <sub>23</sub> | 0.47 ± 0.02<br>(4.2%)   |
| 44                                 | Notoginsenoside M/N/R <sub>3</sub> /R <sub>6</sub> isomer-2             | 18.26 | 961.5377  | 799.4825 [M-H-Glc] <sup>-</sup><br>637.4310 [M-H-2Glc] <sup>-</sup><br>475.3763 [M-H-3Glc] <sup>-</sup>                                                                                                                       | 962.5450  | C <sub>48</sub> H <sub>82</sub> O <sub>19</sub> | 0.42 ± 0.03<br>(6.2%)   |
| 45                                 | Notoginsenoside Rw <sub>1</sub> isomer-2                                | 21.59 | 901.5161  | 769.4763 [M-H-Xyl] <sup>-</sup><br>637.4333 [M-H-2Xyl] <sup>-</sup><br>475.3784 [M-H-2Xyl-Glc] <sup>-</sup>                                                                                                                   | 902.5240  | C <sub>46</sub> H <sub>78</sub> O <sub>17</sub> | 0.36 ± 0.03<br>(9.5%)   |
| 46                                 | Ginsenoside F <sub>1</sub>                                              | 23.16 | 637.4316  | 475.3762 [M-H-Glc] <sup>-</sup>                                                                                                                                                                                               | 638.4394  | C <sub>36</sub> H <sub>62</sub> O <sub>9</sub>  | 0.25 ± 0.05<br>(18.0%)  |
| 47                                 | Notoginsenoside Rw <sub>1</sub> isomer-1                                | 19.35 | 901.5175  | 769.4630 [M-H-Xyl] <sup>-</sup><br>637.4266 [M-H-2Xyl] <sup>-</sup><br>475.3740 [M-H-2Xyl-Glc] <sup>-</sup>                                                                                                                   | 902.5240  | C <sub>46</sub> H <sub>78</sub> O <sub>17</sub> | 0.16 ± 0.02<br>(12.4%)  |
| 48                                 | Notoginsenoside R <sub>2</sub> isomer/Ginsenoside F <sub>3</sub> isomer | 19.84 | 769.4751  | 637.4315 [M-H-Xyl] <sup>-</sup> /<br>[M-H-Ara(p)] <sup>-</sup><br>475.3786 [M-H-Xyl-Glc] <sup>-</sup> /<br>[M-H-Ara(p)-Glc] <sup>-</sup>                                                                                      | 770.4818  | C <sub>41</sub> H <sub>70</sub> O <sub>13</sub> | 0.07 ± 0.03<br>(45.3%)  |
| <i>Ginsenosides of other types</i> |                                                                         |       |           |                                                                                                                                                                                                                               |           |                                                 |                         |
| 51                                 | Notoginsenoside G isomer-1                                              | 19.37 | 959.5239  | 797.4719 [M-H-Glc] <sup>-</sup><br>635.4163 [M-H-2Glc] <sup>-</sup>                                                                                                                                                           | 960.5295  | C <sub>48</sub> H <sub>80</sub> O <sub>19</sub> | 0.55 ± 0.01<br>(2.6%)   |
| 52                                 | Koryoginsenoside R <sub>2</sub> /Notoginsenoside A isomer-3             | 20.40 | 1123.5948 | 961.5411 [M-H-Glc] <sup>-</sup><br>637.4330 [M-H-3Glc] <sup>-</sup><br>475.3785 [M-H-4Glc] <sup>-</sup>                                                                                                                       | 1124.5980 | C <sub>54</sub> H <sub>92</sub> O <sub>24</sub> | 0.56 ± 0.03<br>(6.0%)   |
| 53                                 | Notoginsenoside B/Quinquenoside IV isomer-1                             | 17.61 | 1121.5775 | 959.5234 [M-H-Glc] <sup>-</sup>                                                                                                                                                                                               | 1122.5823 | C <sub>54</sub> H <sub>90</sub> O <sub>24</sub> | 0.37 ± 0.08<br>(20.4%)  |
| 54                                 | Yesaninoside H isomer-1                                                 | 16.10 | 1093.5778 | 961.5405 [M-H-Xyl] <sup>-</sup><br>931.5297 [M-H-Glc] <sup>-</sup><br>799.4866 [M-H-Glc-Xyl] <sup>-</sup><br>769.4646 [M-H-2Glc] <sup>-</sup><br>637.4330 [M-H-2Glc-Xyl] <sup>-</sup><br>475.3788 [M-H-3Glc-Xyl] <sup>-</sup> | 1094.5874 | C <sub>53</sub> H <sub>90</sub> O <sub>23</sub> | 0.40 ± 0.06<br>(14.6%)  |
| 55                                 | Koryoginsenoside Rg <sub>2</sub> /Notoginsenoside A isomer-4            | 20.95 | 1123.5928 | 961.5388 [M-H-Glc] <sup>-</sup><br>799.4866 [M-H-2Glc] <sup>-</sup><br>637.4308 [M-H-3Glc] <sup>-</sup><br>475.3791 [M-H-4Glc] <sup>-</sup>                                                                                   | 1124.598  | C <sub>54</sub> H <sub>92</sub> O <sub>24</sub> | 0.30 ± 0.07<br>(24.1%)  |
| 56                                 | 5,6-Didehydroginsenoside Rb <sub>1</sub>                                | 23.52 | 1105.5815 | 943.5246 [M-H-Glc] <sup>-</sup>                                                                                                                                                                                               | 1106.5873 | C <sub>54</sub> H <sub>90</sub> O <sub>23</sub> | 0.49 ± 0.04<br>(8.3%)   |
| 57                                 | Notoginsenoside I                                                       | 23.65 | 1091.6012 | 929.5482 [M-H-Glc] <sup>-</sup><br>767.4954 [M-H-2Glc] <sup>-</sup><br>605.4413 [M-H-3Glc] <sup>-</sup>                                                                                                                       | 1092.6082 | C <sub>54</sub> H <sub>92</sub> O <sub>22</sub> | 0.49 ± 0.07<br>(14.3%)  |
| 58                                 | Koryoginsenoside Rg <sub>2</sub> /Notoginsenoside A isomer-1            | 19.30 | 1123.5925 | 961.5386 [M-H-Glc] <sup>-</sup><br>799.4844 [M-H-2Glc] <sup>-</sup><br>637.4326 [M-H-3Glc] <sup>-</sup>                                                                                                                       | 1124.598  | C <sub>54</sub> H <sub>92</sub> O <sub>24</sub> | 0.32 ± 0.03<br>(7.9%)   |

|                                                                                                                                                                                                                                                                                                                                                                                                                      |                                                                     |       |           |                                                                                                                                                                                                                                    |           |                                                 |                        |
|----------------------------------------------------------------------------------------------------------------------------------------------------------------------------------------------------------------------------------------------------------------------------------------------------------------------------------------------------------------------------------------------------------------------|---------------------------------------------------------------------|-------|-----------|------------------------------------------------------------------------------------------------------------------------------------------------------------------------------------------------------------------------------------|-----------|-------------------------------------------------|------------------------|
| 59                                                                                                                                                                                                                                                                                                                                                                                                                   | Quinquenoside L <sub>16</sub>                                       | 19.10 | 1141.6051 | 475.3626 [M-H-4Glc] <sup>-</sup><br>979.5528 [M-H-Glc] <sup>-</sup><br>799.4851 [M-H-H <sub>2</sub> O-2Glc] <sup>-</sup><br>637.4312 [M-H-H <sub>2</sub> O-3Glc] <sup>-</sup><br>475.3780 [M-H-H <sub>2</sub> O-4Glc] <sup>-</sup> | 1142.6084 | C <sub>54</sub> H <sub>94</sub> O <sub>25</sub> | 0.29 ± 0.05<br>(15.8%) |
| 60                                                                                                                                                                                                                                                                                                                                                                                                                   | Quinquenoside L <sub>16</sub><br>isomer                             | 18.26 | 1141.6042 | 961.5417 [M-H-H <sub>2</sub> O-Glc] <sup>-</sup><br>799.4868 [M-H-H <sub>2</sub> O-2Glc] <sup>-</sup><br>637.4333 [M-H-H <sub>2</sub> O-3Glc] <sup>-</sup><br>475.3786 [M-H-H <sub>2</sub> O-4Glc] <sup>-</sup>                    | 1142.6084 | C <sub>54</sub> H <sub>94</sub> O <sub>25</sub> | 0.31 ± 0.05<br>(16.1%) |
| 61                                                                                                                                                                                                                                                                                                                                                                                                                   | Notoginsenoside E<br>isomer-2                                       | 19.79 | 979.5460  | 961.5380 [M-H-H <sub>2</sub> O] <sup>-</sup><br>799.4850 [M-H-H <sub>2</sub> O-Glc] <sup>-</sup><br>655.4412 [M-H-2Glc] <sup>-</sup><br>493.3905 [M-H-3Glc] <sup>-</sup>                                                           | 980.5556  | C <sub>48</sub> H <sub>84</sub> O <sub>20</sub> | 0.19 ± 0.03<br>(15.5%) |
| 62                                                                                                                                                                                                                                                                                                                                                                                                                   | Notoginsenoside B/<br>Quinquenoside IV<br>isomer-2                  | 20.08 | 1121.5787 | 959.5152 [M-H-Glc] <sup>-</sup><br>797.4713 [M-H-2Glc] <sup>-</sup>                                                                                                                                                                | 1122.5823 | C <sub>54</sub> H <sub>90</sub> O <sub>24</sub> | 0.21 ± 0.02<br>(7.3%)  |
| 63                                                                                                                                                                                                                                                                                                                                                                                                                   | Yesaninoside H<br>isomer-2                                          | 16.42 | 1093.5789 | 961.5409 [M-H-Xyl] <sup>-</sup><br>931.5429 [M-H-Glc] <sup>-</sup><br>799.4819 [M-H-Glc-Xyl] <sup>-</sup><br>769.4747 [M-H-2Glc] <sup>-</sup><br>637.4329 [M-H-2Glc-Xyl] <sup>-</sup><br>475.3787 [M-H-3Glc-Xyl] <sup>-</sup>      | 1094.5874 | C <sub>53</sub> H <sub>90</sub> O <sub>23</sub> | 0.19 ± 0.02<br>(11.5%) |
| 64                                                                                                                                                                                                                                                                                                                                                                                                                   | Notoginsenoside E<br>isomer-1                                       | 18.90 | 979.5485  | 799.4822 [M-H-H <sub>2</sub> O-Glc] <sup>-</sup><br>637.4326 [M-H-H <sub>2</sub> O-2Glc] <sup>-</sup><br>475.3773 [M-H-H <sub>2</sub> O-3Glc] <sup>-</sup>                                                                         | 980.5556  | C <sub>48</sub> H <sub>84</sub> O <sub>20</sub> | 0.11 ± 0.02<br>(19.6%) |
| 65                                                                                                                                                                                                                                                                                                                                                                                                                   | Yesaninoside H<br>isomer-4                                          | 17.56 | 1093.5780 | 961.5394 [M-H-Xyl] <sup>-</sup><br>799.4847 [M-H-Glc-Xyl] <sup>-</sup><br>637.4310 [M-H-2Glc-Xyl] <sup>-</sup><br>475.3773 [M-H-3Glc-Xyl] <sup>-</sup>                                                                             | 1094.5874 | C <sub>53</sub> H <sub>90</sub> O <sub>23</sub> | 0.23 ± 0.06<br>(27.8%) |
| 66                                                                                                                                                                                                                                                                                                                                                                                                                   | Yesaninoside H<br>isomer-3                                          | 17.02 | 1093.5767 | 961.5400 [M-H-Xyl] <sup>-</sup><br>799.4834 [M-H-Glc-Xyl] <sup>-</sup><br>637.4322 [M-H-2Glc-Xyl] <sup>-</sup><br>475.3786 [M-H-3Glc-Xyl] <sup>-</sup>                                                                             | 1094.5874 | C <sub>53</sub> H <sub>90</sub> O <sub>23</sub> | 0.11 ± 0.02<br>(15.5%) |
| 67                                                                                                                                                                                                                                                                                                                                                                                                                   | Koryoginsenoside Rg <sub>2</sub> /<br>Notoginsenoside A<br>isomer-2 | 19.68 | 1123.5952 | 961.5386 [M-H-Glc] <sup>-</sup><br>799.4740 [M-H-2Glc] <sup>-</sup><br>637.4316 [M-H-3Glc] <sup>-</sup><br>475.3773 [M-H-4Glc] <sup>-</sup>                                                                                        | 1124.5980 | C <sub>54</sub> H <sub>92</sub> O <sub>24</sub> | 0.09 ± 0.02<br>(26.2%) |
| 68                                                                                                                                                                                                                                                                                                                                                                                                                   | Notoginsenoside G<br>isomer-2                                       | 21.83 | 959.5220  | 797.4769 [M-H-Glc] <sup>-</sup><br>635.4115 [M-H-2Glc] <sup>-</sup>                                                                                                                                                                | 960.5295  | C <sub>48</sub> H <sub>80</sub> O <sub>19</sub> | 0.07 ± 0.02<br>(27.2%) |
| <p>The details of detection, characterization, and quantification of ginsenosides in XueShuanTong samples are described in 'MATERIALS AND METHODS' section ('Analysis of XueShuanTong samples for ginsenosides'). The dose level data represent the mean ± standard deviation for samples of five lots of XueShuanTong. Glc, glucopyranosyl; Ara(p), arabinopyranosyl; Rha, rhamnopyranosyl; Xyl, xylopyranosyl.</p> |                                                                     |       |           |                                                                                                                                                                                                                                    |           |                                                 |                        |

**Supplementary Table S2.** Ginsenosides, unchanged and metabolized, detected in plasma and urine samples after intravenously dosing XueShuanTong in the first human study

| ID                                           | Compound                           | Liquid chromatography/mass spectrometry data |                                             |                                                                                                                                                         | Molecular mass (Da) | Molecular formula                                | Occurrence    |
|----------------------------------------------|------------------------------------|----------------------------------------------|---------------------------------------------|---------------------------------------------------------------------------------------------------------------------------------------------------------|---------------------|--------------------------------------------------|---------------|
|                                              |                                    | $t_R$ (min)                                  | $[M-H]^-$<br>$[M+Li]^+ \Delta$<br>( $m/z$ ) | Fragmentation profile<br>( $m/z$ )                                                                                                                      |                     |                                                  |               |
| <i>Ppd-type ginsenosides</i>                 |                                    |                                              |                                             |                                                                                                                                                         |                     |                                                  |               |
| <b>1</b>                                     | Ginsenoside Rb <sub>1</sub>        | 24.38                                        | 1107.5950                                   | 945.5410 [M-H-Glc] <sup>-</sup><br>783.4878 [M-H-2Glc] <sup>-</sup><br>621.4364 [M-H-3Glc] <sup>-</sup><br>459.3835 [M-H-4Glc] <sup>-</sup>             | 1108.6029           | C <sub>54</sub> H <sub>92</sub> O <sub>23</sub>  | Plasma, urine |
| <b>2</b>                                     | Ginsenoside Rd                     | 25.93                                        | 945.5420                                    | 783.4822 [M-H-Glc] <sup>-</sup><br>621.4364 [M-H-2Glc] <sup>-</sup><br>459.3839 [M-H-3Glc] <sup>-</sup>                                                 | 946.5501            | C <sub>48</sub> H <sub>82</sub> O <sub>18</sub>  | Plasma, urine |
| <b>3</b>                                     | Notoginsenoside Fa                 | 23.88                                        | 1239.6350                                   | 1107.5928 [M-H-Xyl] <sup>-</sup><br>945.5412 [M-H-Xyl-Glc] <sup>-</sup><br>783.4875 [M-H-Xyl-2Glc] <sup>-</sup><br>621.4438 [M-H-Xyl-3Glc] <sup>-</sup> | 1240.6452           | C <sub>59</sub> H <sub>100</sub> O <sub>27</sub> | Plasma, urine |
| <b>4</b>                                     | Ginsenoside Ra <sub>3</sub>        | 24.15                                        | 1239.6368                                   | 1107.5931 [M-H-Xyl] <sup>-</sup><br>945.5334 [M-H-Xyl-Glc] <sup>-</sup><br>783.4847 [M-H-Xyl-2Glc] <sup>-</sup><br>621.4455 [M-H-Xyl-3Glc] <sup>-</sup> | 1240.6452           | C <sub>59</sub> H <sub>100</sub> O <sub>27</sub> | Plasma, urine |
| <b>5</b>                                     | Notoginsenoside R <sub>4</sub>     | 23.35                                        | 1239.6343                                   | 1107.5996 [M-H-Xyl] <sup>-</sup><br>945.5383 [M-H-Xyl-Glc] <sup>-</sup><br>783.4833 [M-H-Xyl-2Glc] <sup>-</sup><br>621.4552 [M-H-Xyl-3Glc] <sup>-</sup> | 1240.6452           | C <sub>59</sub> H <sub>100</sub> O <sub>27</sub> | Plasma, urine |
| <i>Ppt-type ginsenosides</i>                 |                                    |                                              |                                             |                                                                                                                                                         |                     |                                                  |               |
| <b>31</b>                                    | Ginsenoside Rg <sub>1</sub>        | 18.84                                        | 799.4838                                    | 637.4308 [M-H-Glc] <sup>-</sup><br>475.3768 [M-H-2Glc] <sup>-</sup>                                                                                     | 800.4922            | C <sub>42</sub> H <sub>72</sub> O <sub>14</sub>  | Plasma, urine |
| <b>32</b>                                    | Notoginsenoside R <sub>1</sub>     | 18.04                                        | 931.5286                                    | 799.5023 [M-H-Xyl] <sup>-</sup><br>769.4864 [M-H-Glc] <sup>-</sup><br>637.4287 [M-H-Xyl-Glc] <sup>-</sup><br>475.3754 [M-H-Xyl-2Glc] <sup>-</sup>       | 932.5345            | C <sub>47</sub> H <sub>80</sub> O <sub>18</sub>  | Plasma, urine |
| <b>33</b>                                    | Ginsenoside Re                     | 18.73                                        | 945.5438                                    | 799.4750 [M-H-Rha] <sup>-</sup><br>783.4831 [M-H-Glc] <sup>-</sup><br>637.4395 [M-H-Rha-Glc] <sup>-</sup><br>475.3739 [M-H-Rha-2Glc] <sup>-</sup>       | 946.5501            | C <sub>48</sub> H <sub>82</sub> O <sub>18</sub>  | Plasma, urine |
| <b>34</b>                                    | Ginsenoside Rh <sub>1</sub>        | 23.80                                        | 645 <sup>Δ</sup>                            | 465 [M+Li-H <sub>2</sub> O-Glc] <sup>+</sup>                                                                                                            | 638.4394            | C <sub>36</sub> H <sub>62</sub> O <sub>9</sub>   | Plasma, urine |
| <b>35</b>                                    | 20-Gluco-ginsenoside Rf            | 18.21                                        | 969 <sup>Δ</sup>                            | 349 [M+Li-PPD-Glc] <sup>+</sup>                                                                                                                         | 962.5450            | C <sub>48</sub> H <sub>82</sub> O <sub>19</sub>  | Plasma only   |
| <b>36</b>                                    | Ginsenoside Rg <sub>2</sub>        | 22.74                                        | 791 <sup>Δ</sup>                            | 465 [M+Li-H <sub>2</sub> O-Glc-Rha] <sup>+</sup>                                                                                                        | 784.4973            | C <sub>42</sub> H <sub>72</sub> O <sub>13</sub>  | Plasma, urine |
| <i>Metabolites of ppt-type ginsenosides</i>  |                                    |                                              |                                             |                                                                                                                                                         |                     |                                                  |               |
| <b>PPT</b>                                   | 20(S)-protopanaxatriol             | 26.42                                        | 483 <sup>Δ</sup>                            | 465 [M+Li-H <sub>2</sub> O] <sup>+</sup>                                                                                                                | 476.3866            | C <sub>30</sub> H <sub>52</sub> O <sub>4</sub>   | Plasma only   |
| <i>Metabolites of 20(S)-protopanaxatriol</i> |                                    |                                              |                                             |                                                                                                                                                         |                     |                                                  |               |
| <b>M<sub>3</sub></b>                         | Oxidized metabolite                | 17.82                                        | 517 <sup>Δ</sup>                            | 499 [M+Li-H <sub>2</sub> O] <sup>+</sup>                                                                                                                | 510.3920            | C <sub>30</sub> H <sub>54</sub> O <sub>6</sub>   | Urine only    |
| <b>M<sub>4</sub></b>                         | Oxidized metabolite                | 17.99                                        | 515 <sup>Δ</sup>                            | 399 [M+Li-116] <sup>+</sup>                                                                                                                             | 508.3764            | C <sub>30</sub> H <sub>52</sub> O <sub>6</sub>   | Plasma, urine |
| <b>M<sub>5</sub></b>                         | Oxidized metabolite                | 18.90                                        | 515 <sup>Δ</sup>                            | 399 [M+Li-116] <sup>+</sup>                                                                                                                             | 508.3764            | C <sub>30</sub> H <sub>52</sub> O <sub>6</sub>   | Urine only    |
| <b>M<sub>6</sub></b>                         | Oxidized metabolite                | 19.39                                        | 517 <sup>Δ</sup>                            | 499 [M+Li-H <sub>2</sub> O] <sup>+</sup>                                                                                                                | 510.3920            | C <sub>30</sub> H <sub>54</sub> O <sub>6</sub>   | Plasma, urine |
| <b>M<sub>7</sub></b>                         | Oxidized/dehydrogenated metabolite | 19.42                                        | 513 <sup>Δ</sup>                            | 495 [M+Li-H <sub>2</sub> O] <sup>+</sup>                                                                                                                | 506.3607            | C <sub>30</sub> H <sub>50</sub> O <sub>6</sub>   | Urine only    |
| <b>M<sub>8</sub></b>                         | Oxidized metabolite                | 20.46                                        | 515 <sup>Δ</sup>                            | 399 [M+Li-116] <sup>+</sup>                                                                                                                             | 508.3764            | C <sub>30</sub> H <sub>52</sub> O <sub>6</sub>   | Plasma, urine |
| <b>M<sub>11</sub></b>                        | Oxidized metabolite                | 20.63                                        | 515 <sup>Δ</sup>                            | 497 [M+Li-H <sub>2</sub> O] <sup>+</sup>                                                                                                                | 508.3764            | C <sub>30</sub> H <sub>52</sub> O <sub>6</sub>   | Plasma, urine |
| <b>M<sub>12</sub></b>                        | Oxidized metabolite                | 22.68                                        | 499 <sup>Δ</sup>                            | 481 [M+Li-H <sub>2</sub> O] <sup>+</sup>                                                                                                                | 492.3815            | C <sub>30</sub> H <sub>52</sub> O <sub>5</sub>   | Plasma, urine |
| <b>M<sub>13</sub></b>                        | Oxidized/dehydrogenated metabolite | 22.46                                        | 513 <sup>Δ</sup>                            | 495 [M+Li-H <sub>2</sub> O] <sup>+</sup>                                                                                                                | 506.3607            | C <sub>30</sub> H <sub>50</sub> O <sub>6</sub>   | Plasma, urine |
| <b>M<sub>14</sub></b>                        | Oxidized/dehydrogenated metabolite | 23.02                                        | 497 <sup>Δ</sup>                            | 479 [M+Li-H <sub>2</sub> O] <sup>+</sup>                                                                                                                | 490.3658            | C <sub>30</sub> H <sub>50</sub> O <sub>5</sub>   | Plasma, urine |

The details of human study and bioanalytical assay are described in 'MATERIALS AND METHODS' section ('Human studies' and 'Analysis of human samples for unchanged and metabolized ginsenosides', respectively). Due to assay sensitivity, some minor ginsenosides and the metabolites were detected and characterized using an AB Sciex API 4000 Q Trap mass spectrometer, interfaced via a Turbo V ion source with an Agilent 1290 Infinity II liquid chromatograph and the mobile phase contained 0.025 mmol/L lithium acetate. The data represent mean ± standard deviation. Glc, glucopyranosyl; Rha, rhamnopyranosyl; Xyl, xylopyranosyl.

Supplementary Table S3. Pharmacokinetics of midazolam and its metabolite 1'-hydroxymidazolam in human subjects of human study 2

| Day                        | $C_{max}$<br>(nmol/L) | $AUC_{0-8h}$<br>(nmol/L·h) | $AUC_{0-\infty}$<br>(nmol/L·h) | $t_{1/2}$<br>(h) |
|----------------------------|-----------------------|----------------------------|--------------------------------|------------------|
| <i>Midazolam</i>           |                       |                            |                                |                  |
| Day 1                      | 168.9 ± 79.9          | 298.0 ± 121.3              | 314.5 ± 129.0                  | 1.7 ± 0.4        |
| Day 4                      | 254.2 ± 155.2         | 316.7 ± 115.3              | 336.9 ± 127.1                  | 2.0 ± 0.6        |
| Day 18                     | 223.6 ± 58.3          | 359.5 ± 98.8               | 381.8 ± 108.8                  | 2.1 ± 0.2        |
| <i>1'-hydroxymidazolam</i> |                       |                            |                                |                  |
| Day 1                      | 63.8 ± 29.1           | 91.0 ± 39.2                | 97.0 ± 37.9                    | 1.3 ± 0.4        |
| Day 4                      | 72.5 ± 28.7           | 81.6 ± 26.9                | 86.7 ± 27.4                    | 1.3 ± 0.7        |
| Day 18                     | 62.1 ± 31.8           | 79.2 ± 31.8                | 86.1 ± 32.9                    | 1.6 ± 0.8        |

The details of human study are described in 'MATERIALS AND METHODS' section ('Human studies'). On day 1, the subjects (m17–m24) received an oral dose of midazolam tablet at 7.5 mg. After 72-h washout period, they received a 2.5-h infusion of XueShuanTong daily for 15 days (from day 4 to day 18) at 500 mg per day. On days 4 and 18, the subjects also received an oral dose of midazolam tablet at 7.5 mg (just after terminating infusion of XueShuanTong on the day). The data represent mean ± standard deviation.  $C_{max}$ , maximum plasma concentration;  $AUC_{0-8h}$ , area under the plasma concentration-time curve from 0 to 8 h;  $AUC_{0-\infty}$ , area under the plasma concentration-time curve from 0 to infinity;  $t_{1/2}$ , terminal half-life.

Supplementary Table S4. In vitro inhibition of human P450 enzymes by ginsenosides

| P450    | IC <sub>50</sub> (μmol/L) |                                 |                    |                                  |                                     |                    |
|---------|---------------------------|---------------------------------|--------------------|----------------------------------|-------------------------------------|--------------------|
|         | Positive control          | Ginsenoside Rb <sub>1</sub> (1) | Ginsenoside Rd (2) | Ginsenoside Rg <sub>1</sub> (31) | Notoginsenoside R <sub>1</sub> (32) | XueShuanTong (XST) |
| CYP3A   | 0.07                      | > 100                           | 52.78              | > 100                            | > 100                               | > 100              |
| CYP1A2  | 6.96                      | > 100                           | > 100              | > 100                            | > 100                               | > 100              |
| CYP2A6  | 0.21                      | > 100                           | > 100              | > 100                            | > 100                               | > 100              |
| CYP2B6  | 3.69                      | > 100                           | > 100              | > 100                            | > 100                               | > 100              |
| CYP2D6  | 0.08                      | > 100                           | 81.07              | > 100                            | > 100                               | > 100              |
| CYP2C8  | 0.26                      | > 100                           | 96.20              | > 100                            | > 100                               | > 100              |
| CYP2C9  | 0.25                      | > 100                           | > 100              | > 100                            | > 100                               | > 100              |
| CYP2C19 | 5.75                      | > 100                           | 56.21              | > 100                            | > 100                               | > 100              |

The details of in vitro CYP3A inhibition study are described in 'MATERIALS AND METHODS' section ('In vitro assessment of CYP3A inhibition by XueShuanTong ginsenosides'). Inhibition of other human cytochrome P450 enzymes was assessed using human liver microsomes, the final concentrations of which were 0.1, 0.1, 0.2, 0.05, 0.05, 0.2, and 0.1 mg protein/mL for CYP1A2-, CYP2A6-, CYP2B6-, CYP2C8-, CYP2C9-, CYP2C19-, and CYP2D6-mediated metabolic reactions, respectively. Phenacetin, coumarin, bupropion, amodiaquine, diclofenac, (S)-mephenytoin, and dextromethorphan were used as probe substrates for CYP1A2, CYP2A6, CYP2B6, CYP2C8, CYP2C9, CYP2C19, and CYP2D6, respectively; formation of acetaminophen, 7-hydroxycoumarin, hydroxybupropion, N-desmethylamodiaquine, 4'-hydroxydiclofenac, (S)-mephenytoin 4'-hydroxylation, and dextrorphan was measured individually by liquid chromatography/mass spectrometry-based assays for phenotyping of these P450 enzymes, respectively. Furaflavone, tranlycypromine, quercetin, sulfaphenazole, and quinidine were used as positive inhibitors (positive controls) for CYP1A2, CYP2A6, CYP2B6, CYP2C8, CYP2C9, and CYP2D6, respectively. Incubation times for CYP1A2-, CYP2A6-, CYP2B6-, CYP2C8-, CYP2C9-, CYP2C19-, and CYP2D6-mediated metabolic reactions were 20, 20, 20, 20, 10, 30, and 20 min, respectively.

Supplementary Table S5. Pharmacokinetics of ginsenosides in rats after a single 15-min intravenous infusion of XueShuanTong

| Compound (ID)                       | $C_{max}$ ( $\mu\text{mol/L}$ ) | $AUC_{0-\infty}$ ( $\mu\text{mol/L}\cdot\text{h}$ ) | $t_{1/2}$ (h) | $CL_{tot,p}$ (mL/h/kg) | $V_{SS}$ (mL/kg) |
|-------------------------------------|---------------------------------|-----------------------------------------------------|---------------|------------------------|------------------|
| Ginsenoside Rb <sub>1</sub> (1)     | 220.3 ± 25.0                    | 2479 ± 272                                          | 17.1 ± 2.3    | 4.5 ± 0.5              | 106 ± 9          |
| Ginsenoside Rd (2)                  | 6.6 ± 0.3                       | 172.7 ± 17.7                                        | —             | 1.6 ± 1.0              | 109 ± 50         |
| Ginsenoside Rg <sub>1</sub> (31)    | 101.7 ± 7.3                     | 36 ± 6                                              | 1.3 ± 0.2     | 703.8 ± 111.0          | 203 ± 12         |
| Notoginsenoside R <sub>1</sub> (32) | 15.0 ± 2.8                      | 7 ± 1                                               | 0.5 ± 0.1     | 657.0 ± 109.6          | 266 ± 13         |

All animal care and use complied with the Guidance for Ethical Treatment of Laboratory Animals (The Ministry of Science and Technology of China, 2006, at [www.most.gov.cn/fggw/zfwj/zfwj2006](http://www.most.gov.cn/fggw/zfwj/zfwj2006)). Rat studies were implemented according to protocols that were reviewed and approved by the Institutional Animal Care and Use Committee at Shanghai Institute of Materia Medica (Shanghai, China). Male Sprague-Dawley rats were obtained from SIPPR-BK Laboratory Animal Co. Ltd. (Shanghai, China), housed at 20–24°C and relative humidity of 30%–70% with a 12-h light/dark cycle, and maintained under specific-pathogen-free conditions. Rats were provided commercial rat chow and access to filtered tap water ad libitum and were acclimated to the facilities and environment for one week before use. All rats received in-house femoral-vein-cannulation for infusion of XueShuanTong and femoral-artery-cannulation for blood sampling. After surgery, rats were housed singly and allowed to regain their preoperative body weights before the studies. To assess the systemic exposure to ginsenosides, six rats received a 15-min intravenous infusion of XueShuanTong at 50 mg/kg; the dose was translated from the label human dose of XueShuanTong (500 mg/day) by using a body surface area normalization method. Serial blood samples [around 150  $\mu\text{L}$ ; before and 5, 10, 15 (just before terminating the infusion), 20, 30, 45 min, and 1.25, 2.25, 4.25, 6.25, 8.25, 10.25, 24, 48, and 72 h after starting the infusion] were collected in heparinized tubes and then centrifuged to yield plasma fractions. The plasma samples were aliquoted and then stored at  $-70^\circ\text{C}$  pending analysis. All used rats were euthanized with  $\text{CO}_2$  gas. The data represent mean  $\pm$  standard deviation.  $C_{max}$ , maximum plasma concentration;  $AUC_{0-\infty}$ , area under the plasma concentration-time curve from 0 to infinity;  $t_{1/2}$ , terminal half-life;  $CL_{tot,p}$ , total plasma clearance;  $V_{SS}$ , apparent volume of distribution at steady state. AUC of ginsenoside Rd in this table was  $AUC_{0-72h}$ , rather than  $AUC_{0-\infty}$ ; this is because there were continuous increases in plasma concentration from 10.25 to 48 h after intravenously dosing XueShuanTong in most rats. Due to this reason, it was difficult to estimate apparent  $t_{1/2}$  of ginsenoside Rd. The unusual change in plasma concentration of ginsenoside Rd after dosing XueShuanTong most likely resulted from biotransformation of concurrent ginsenoside Rb<sub>1</sub> into ginsenoside Rd by rat hepatic glucosidase. More details pending publication elsewhere.



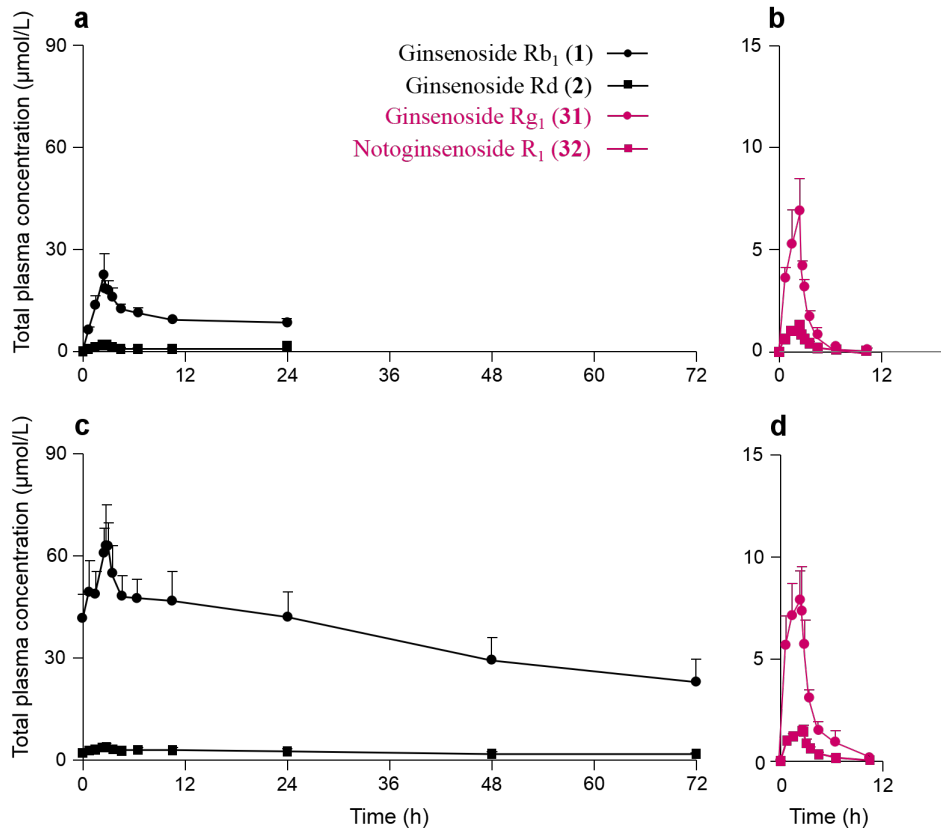

**Supplementary Fig. S1** Mean total plasma concentrations of ginsenosides Rb<sub>1</sub> (1), Rd (2), and Rg<sub>1</sub> (31) and notoginsenoside R<sub>1</sub> (32) over time after dosing XueShuanTong at 500 mg/day on days 4 (a, b) and 18 (c, d) in human subjects (m17–m24; human study 2). The repeated dosing of XueShuanTong was started on day 4 and ended on day 18. Blood samples were collected for only 24 h after dosing on day 4.

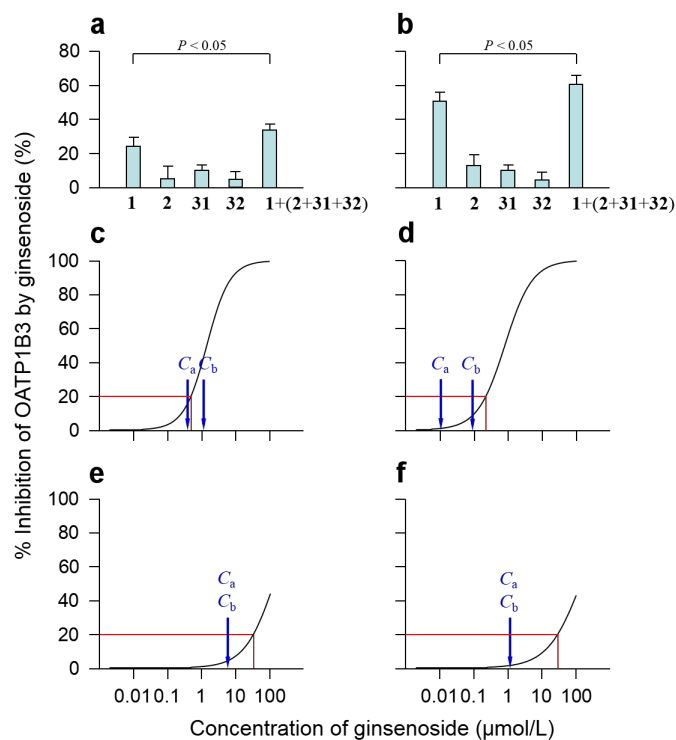

**Supplementary Fig. S2** Comparative % inhibition of OATP1B3 by ginsenoside Rb<sub>1</sub> (**1**) alone and in the presence of ginsenosides Rd (**2**) and Rg<sub>1</sub> (**31**) and notoginsenoside R<sub>1</sub> (**32**). In panel a, concentrations ( $C_a$ ) of ginsenosides Rb<sub>1</sub> (**1**), Rd (**2**), and Rg<sub>1</sub> (**31**), and notoginsenoside R<sub>1</sub> (**32**) were the compounds' unbound  $C_{max}$  after the single dose of XueShuanTong, i.e., 0.39, 0.01, 6.07, and 1.18  $\mu\text{mol/L}$ , respectively, and the compounds' concentrations in '1 + (2 + 31 + 32)' were 0.39, 0.01, 6.07, and 1.18  $\mu\text{mol/L}$  for ginsenosides Rb<sub>1</sub> (**1**), Rd (**2**), and Rg<sub>1</sub> (**31**), and notoginsenoside R<sub>1</sub> (**32**), respectively. Such concentrations ( $C_b$ ) in panel b were 1.20, 0.09, 6.07, and 1.18  $\mu\text{mol/L}$ , respectively, which were close to unbound  $C_{max}$  after the repeated doses of the injection on day 18. Panels c, d, e, and f are % inhibition of OATP1B3 over ginsenoside concentration by ginsenosides Rb<sub>1</sub> (**1**), Rd (**2**), and Rg<sub>1</sub> (**31**) and notoginsenoside R<sub>1</sub> (**32**), respectively.

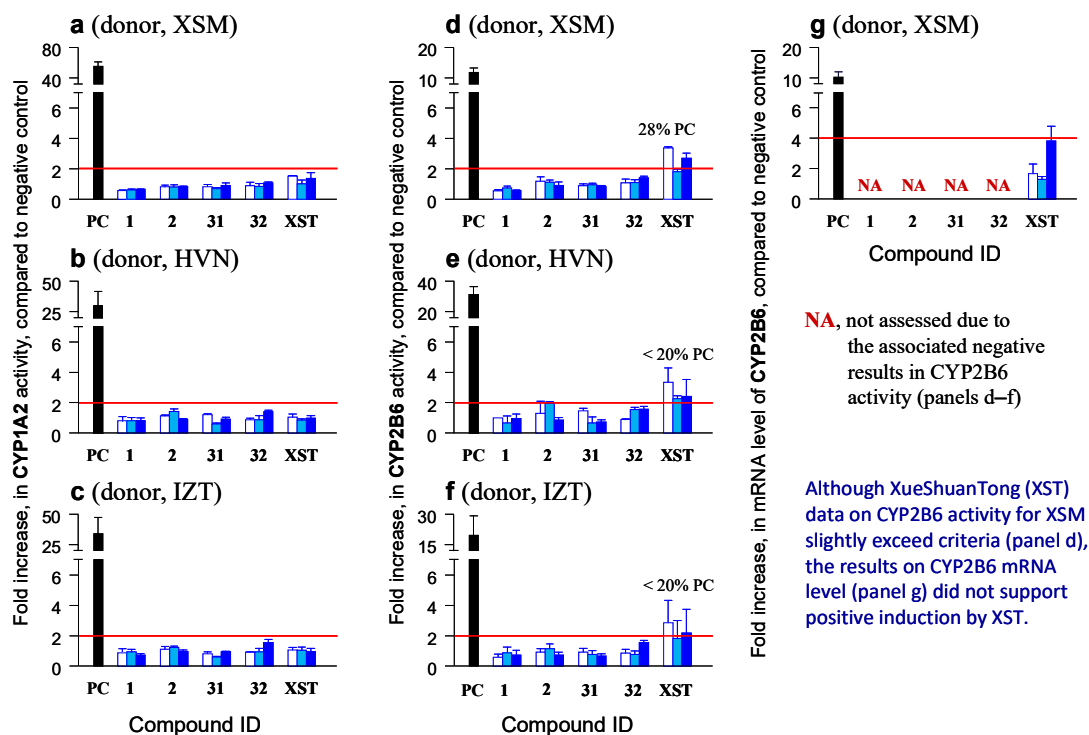

**Supplementary Fig. S3** Inductive effects of ginsenosides Rb<sub>1</sub> (**1**), Rd (**2**), and Rg<sub>1</sub> (**31**), notoginsenoside R<sub>1</sub> (**32**), and XueShuanTong (**XST**) on CYP1A2 activity (**a–c**), CYP2B6 activity (**d–f**), and CYP2B6 mRNA (**g**). These ginsenosides (**1**, **2**, **31**, and **32**) and XueShuanTong (**XST**) were tested at low, intermediate, and high concentrations (open, light blue, and blue bars, respectively), i.e., 1/10/100 μmol/L, except for ginsenoside Rd (**2**) at 0.1/1/10 μmol/L and XueShuanTong (**XST**) at the marker concentrations 1/10/100 μmol/L of ginsenoside Rg<sub>1</sub> (**31**) present. Cryopreserved human hepatocytes from three donors [XSM (**a**, **d**, **g**), HVN (**b**, **e**), and IZT (**c**, **f**)] were used; β-naphthoflavone and rifampin (both at 20 μmol/L; known inducers of CYP1A2 and CYP2B6, respectively) were used as positive controls (PC). The details of in vitro induction studies for CYP1A2 and CYP2B6 were similar to that for CYP3A, except for phenacetin and bupropion used as probe substrates of CYP1A2 and CYP2B6, respectively. Data are expressed as the mean ± standard deviation.
